# Supplementary material
Source: PubMed Central journal article supplement (PMC6640933)
Supplement: ao7b00017_si_001.pdf [file ao7b00017_si_001.pdf]

# Build a Rigid Flexible Graphene/Silicone Interface by Embedding SiO<sub>2</sub> for Adhesive Application

*Hualan Wang,<sup>a,b,\*</sup> Cheng Yang,<sup>a</sup> Risheng Liu,<sup>a</sup> Kai Gong,<sup>b,\*</sup> Qingli Hao,<sup>c</sup> Xin Wang,<sup>c</sup>  
Jirong Wu<sup>a</sup> Guodong Zhang,<sup>a</sup> Yingqian Hu,<sup>a</sup> Jianxiong Jiang,<sup>a,\*</sup>*

<sup>a</sup>. Key Laboratory of Organosilicon Chemistry and Material Technology, Ministry of Education, Hangzhou Normal University, No. 2318, Yu Hangtang Rd, Hangzhou, 311121, China.

<sup>b</sup>. School of Pharmaceutical Science, Jiangnan University, No.1800, Lihu, Wuxi, 214122, China.

<sup>c</sup>. Key Laboratory of Soft Chemistry and Functional Materials, Ministry of Education, Nanjing University of Science and Technology, No.200, Xiao Lingwei, Nanjing, 210094, China.

---

\* Corresponding authors. Tel/Fax: +86 571 28868903.

*Email addresses:* hualanwang@163.com (Hualan Wang), kingong222@163.com (Kai Gong), fgeorge@21cn.com (Jianxiong Jiang)

## Contents

- XRD data of rGE, SiO<sub>2</sub> and rGES-2.
- FTIR spectra of rGE, SiO<sub>2</sub> and rGES-2.
- Cross-linking reactions of polysiloxane.
- Schematic interaction between polysiloxane and SiO<sub>2</sub> in a cross-linked system.
- Schematic interaction between polysiloxane and rGE in the SR matrix.
- The blending processes of rGES/SR composites via green solvent-free process.

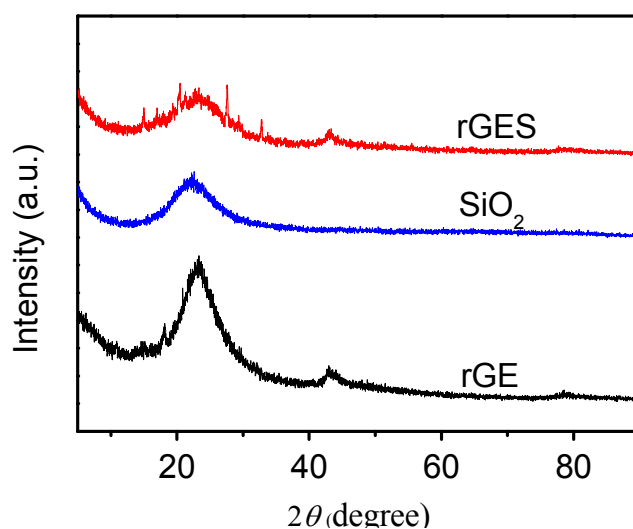

Figure S1. XRD of rGE, SiO<sub>2</sub> and rGES-2.

Figure S1 gives the XRD patterns of rGE, SiO<sub>2</sub> and rGES. The rGE shows a broad peak at 23.3°, the peak of SiO<sub>2</sub> was found at 22.6°, and rGES shows a comprehensive peak of rGE and SiO<sub>2</sub> at 22.9°, signifying a certain integration of SiO<sub>2</sub> and rGE. After integrated with rGE in rGES composites, SiO<sub>2</sub> shows some narrow and small new peaks in the range of 15–35°, indicating that the regularity of SiO<sub>2</sub> is enhanced. A more regular growth of SiO<sub>2</sub> is promoted by the existence of rGE. Moreover, no

obvious graphite peak of  $26.6^\circ$  can be found in rGES, indicating the agglomeration is inhibited well by  $\text{SiO}_2$  nanoparticles and a good dispersion of rGE in rGES.

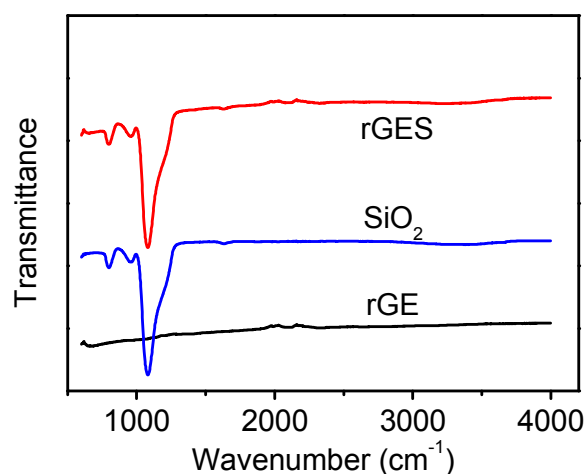

Figure S2. FTIR spectra of rGE,  $\text{SiO}_2$  and rGES-2.

In order to further reveal the interaction between rGE and  $\text{SiO}_2$ , the FT-IR spectra of GO, rGE and rGES are compared in Figure S2. For the case of  $\text{SiO}_2$ , the peak at about  $790\text{ cm}^{-1}$  could be assigned to the typical vibration mode of framework Si–O–Si,  $1064\text{ cm}^{-1}$  is the asymmetric stretching vibration of Si O Si, and this peak also emerges in rGES just as shown in Figure S2. A weak band located at  $950\text{ cm}^{-1}$  for  $\text{SiO}_2$  was mainly attributed to the stretching vibrations of Si–OH groups at defect sites. Most of the characteristic peaks of  $\text{SiO}_2$  can be found in rGES, indicating that the components are well combined and successfully constitute the final composite.

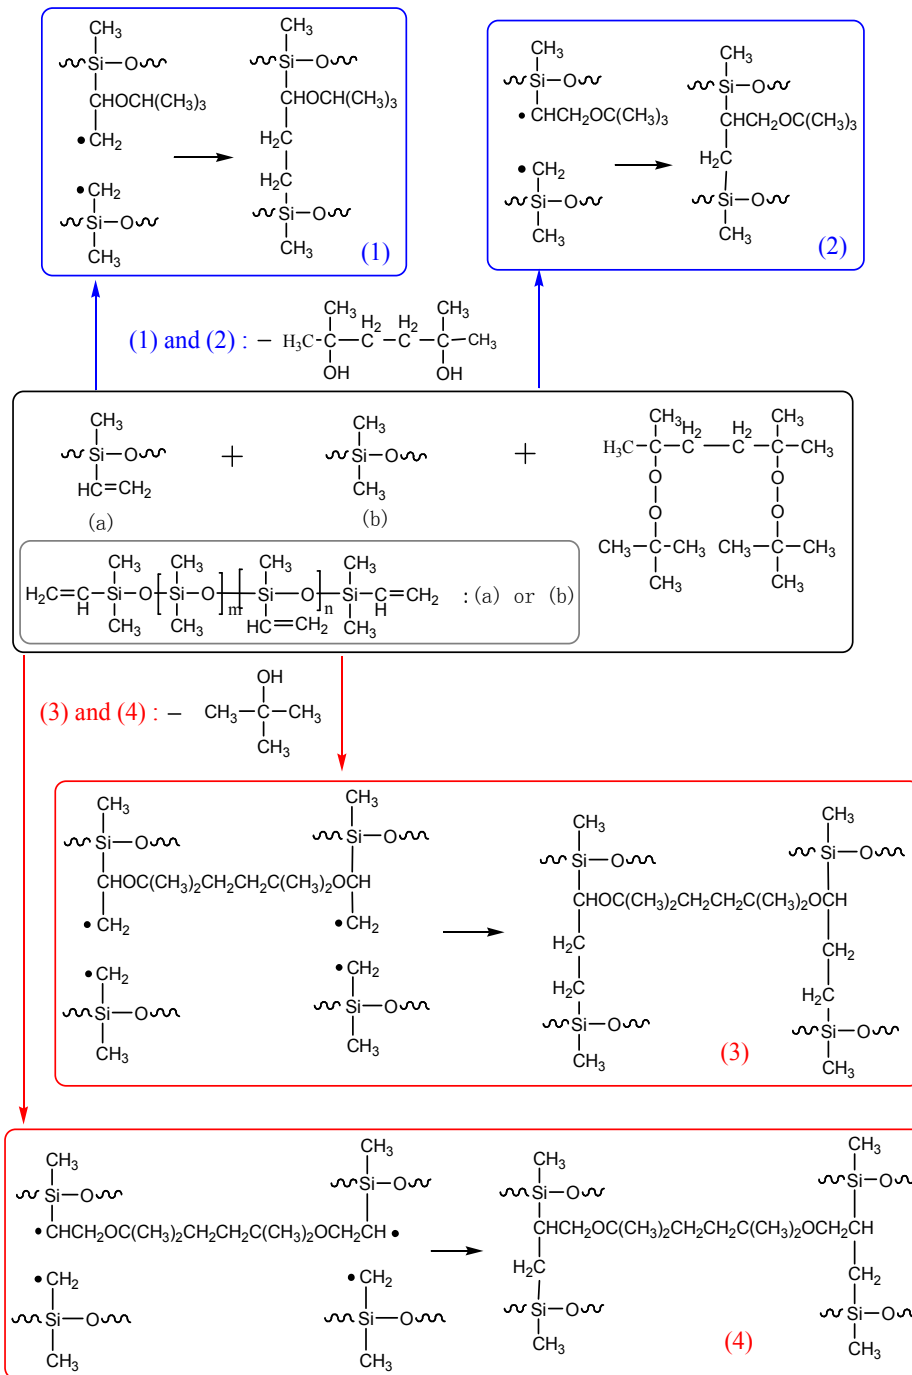

Scheme S1. Cross-linking reactions of polysiloxane.

Most unfilled silicone networks display extremely poor mechanical properties except self-enhanced matrixes. To understand the enhancing mechanism of rGES in



The most frequently used filler for silicone matrixes is precipitated or fumed SiO<sub>2</sub>, which helps to form more developed network structures and stronger interactions in vulcanized polysiloxane matrixes.<sup>S5, S6</sup> Abundant hydrogen bonds between SiO<sub>2</sub> nanoparticles and polysiloxane form due to excellent compatibility and dispersion.<sup>S7, S8</sup> Besides the interaction provided by vulcanized agents, another strong interaction among different polysiloxane moleculars is achieved through bridging of SiO<sub>2</sub>. These two modes, stable and more intertwined together, help show more effective interfacial stress transfer<sup>S9, S10</sup> and increased mechanical performances for polysiloxane matrix than a single crosslinking mode (Scheme S2).

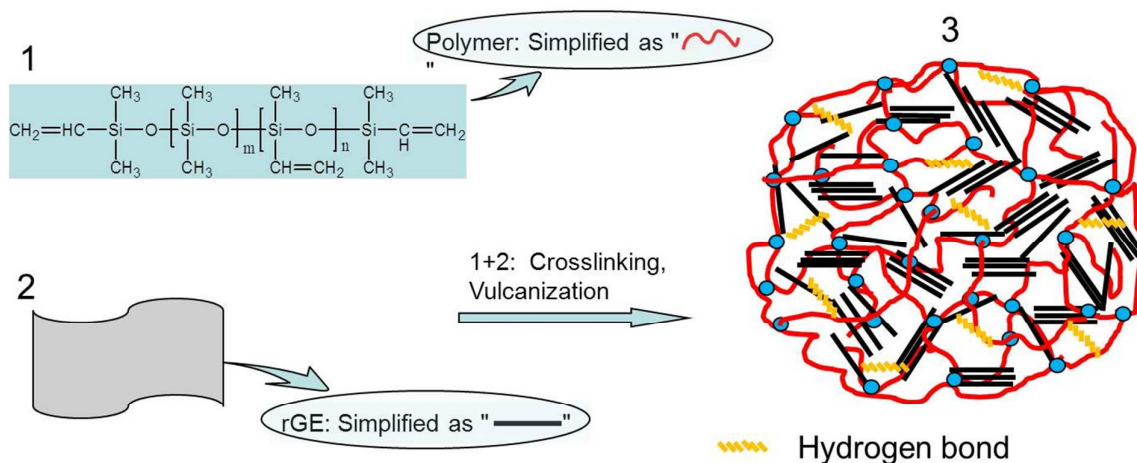

Scheme S3. Schematic interaction between polysiloxane and rGE in the SR matrix.

However, rGE is not as compatible with polysiloxane as SiO<sub>2</sub>, and the trend of graphitization leads to a large number of multilayer dispersion of rGE in polysiloxane (Scheme S3). Thicker rGE causes higher rigidity and harder blend with flexible polysiloxane due to lack of buffer or transition at the incompatible interface. As a result, the extraordinary performances of rGE are not effectively elaborated, and the

rGE/polysiloxane interface is easily out of control or failure under external physical and chemical changes. One way to solve the problem is to overcome the stack of rGE and improve the compatibility with polysiloxane. Chemical modification and nano compounding are demonstrated able to prevent the rGE layers from stacking.<sup>S11, S12</sup> Since SiO<sub>2</sub> performs well in filled silicone matrixes, we would like to try the nano modification of rGE with nanoscale SiO<sub>2</sub>.

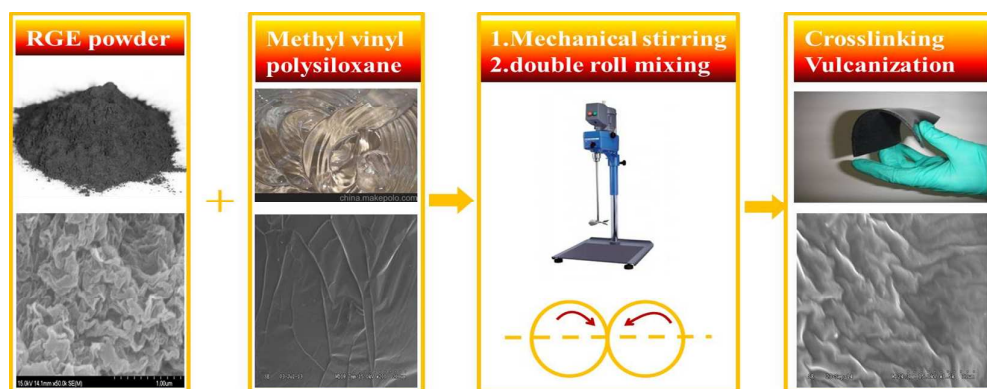

Scheme S4 The blending processes of rGES/SR composites via green solvent-free process.

## REFERENCES

(S1) Zhang, Y. R.; Ren, L.; Tu, Q.; Wang, X. Q.; Liu, R.; Li, L. Fabrication of Reversible Poly(Dimethylsiloxane) Surfaces via Host-Guest Chemistry and Their Repeated Utilization in Cardiac Biomarker Analysis. *Anal. Chem.* **2011**, 83(24), 9651-9659.

(S2) Gan, L. M.; Ni, H. Y.; Zhou, Y. J.; Chen, J. Study on Vulcanization and Thermal Decomposition Behaviors of Methyl Vinyl Silicone

Rubber/Polyurethane Rubber Blends. *J. Macromol. Sci. B* **2011**, *50*(8), 1491-1499.

(S3) Meng, Y.; Wei, Z.; Lu, Y. L.; Zhang, L. Q.; Structure, Morphology, and Mechanical Properties of Polysiloxane Elastomer Composites Prepared by In Situ Polymerization of Zinc Dimethacrylate. *Express. Polym. Lett.* **2012**, *6*(11), 882-894.

(S4) Dunham, M. L.; Bailey, D. L.; Mixer, R. Y.; New Curing System for Silicone Rubber. *Ind. Eng. Chem. Res.* **1957**, *49*(9), 1373-1376.

(S5) Valentín, J. L.; Mora-Barrantes, I.; Carretero-González, J.; López-Manchado, M. A.; Sotta, P.; Long, D. R.; Saalwächter, K.; Novel Experimental Approach to Evaluate Filler-Elastomer Interactions. *Macromolecules* **2010**, *43*(1) 334-346.

(S6) Tang, Z.; Zhang, L.; Feng, W.; Guo, B.; Liu, F.; Jia, D.; Rational Design of Graphene Surface Chemistry for High-Performance Rubber/Graphene Composites. *Macromolecules* **2014**, *47*(24), 8663-8673.

(S7) Duan, L. Q.; Ma, Q. S.; Chen, Z. H. Preparation and Characterization of Mesoporous Silicon Oxycarbide Ceramics without Free Carbon from Polysiloxane. *J. Eur. Ceram. Soc.* **2013**, *33*(4), 841-846.

(S8) Yang, L.; Qiu, S. J.; Zhang, Y.; Xu, Y.S. Preparation of PDMS/SiO<sub>2</sub> Composites via Ultrasonical Modification and Miniemulsion Polymerization. *J. Polym. Res.* **2013**, *20*(1), 68-73.



(S9) Young, R. J.; Deng, L. B.; Wafy, T. Z.; Kinloch, I. A.. Interfacial and Internal Stress Transfer in Carbon Nanotube Based Composites. *J. Mater. Sci.* **2016**, *51*(1), 344-352.

(S10) Valles, C.; Beckert, F.; Burk, L.; Mulhaupt, R.; Young, R. J.; Kinloch, I. A. Effect of the C/O Ratio in Graphene Oxide Materials on the Reinforcement of Epoxy-Based Composites. *J. Polym. Sci. Pol. Phys.* **2016**, *54*(2), 281-291.

(S11) Choi, K. S.; Liu, F.; Choi, J. S.; Seo, T. S. Fabrication of Free-Standing Multilayered Graphene and Poly(3,4-Ethylenedioxythiophene) Composite Films with Enhanced Conductive and Mechanical Properties. *Langmuir* **2010**, *26*(15), 12902-12908.

(S12) Saxena, A. P.; Deepa, M.; Joshi, A. G.; Bhandari, S.; Srivastava, A.K. Poly(3,4-ethylenedioxythiophene)-Ionic Liquid Functionalized Graphene/Reduced Graphene Oxide Nanostructures: Improved Conduction and Electrochromism. *ACS Appl. Mater. Inter.* **2011**, *3*(4), 1115-1126.
